# Supplementary material
Source: PubMed Central journal article supplement (PMC4135296)
Supplement: 97320630010460S1.pdf [file 97320630010460S1.pdf]

## Supplementary material:

**Table 1:** Flavonoids details, their plant source and their interaction with DENV NS1

| Phytochemical Name                                                                               | Plant Name                                             | Score   | RMSD Value | Residues interacting with Ligand (H-Bonding) | Residues in Close Contact with Ligand |
|--------------------------------------------------------------------------------------------------|--------------------------------------------------------|---------|------------|----------------------------------------------|---------------------------------------|
| <i>Deoxycalyxin A</i>                                                                            | <i>Alpinia blepharocalyx</i> K. Schum. (Zingiberaceae) | 11.7048 | 1.91       | Asn130, His129, Lys85, Asn76                 | Ser80, Thr87, Glu83, Meth89           |
| <i>3,5,7,3',4'-pentahydroxyflavonol-3-O-beta-D-galactopyranoside (3R)-3',8-Dihydroxyvestitol</i> | <i>Vaccinium macrocarpon</i>                           | 11.9174 | 3.00       | Asn130, His129, Lys85                        | Ser80, Glu83                          |
| <i>Sanggenon O</i>                                                                               | <i>Dalbergia odorifera</i>                             | 12.8042 | 1.44       | Asn130, Ser80                                | Lys85, Thr87, Asn76, Glu83            |
| <i>Epigallocatechin gallate</i>                                                                  | <i>Morus alba</i>                                      | 11.6887 | 1.87       | Asn130, His129,                              | Lys85, Ser80, Thr87                   |
| <i>Chamaejasmine</i>                                                                             | <i>Camellia sinensis</i>                               | 12.6820 | 3.07       | Asn130, Ly85                                 | His129, Ser80                         |
|                                                                                                  | <i>Enkleia siamensis</i>                               | 11.6609 | 1.81       | Asn130                                       | Ser80, Lys85,                         |
|                                                                                                  | <i>Diphysa robinoides</i>                              |         |            |                                              | Asn76, His129, Glu83                  |

**Table 2:** Molecular properties of flavonoids assessed through Ligand properties checking tool of MOE

| Phytochemical Name                                                                               | Molecular formula                               | Molecular weight | Log P | TPSA    | Hydrogen bond donor | Hydrogen bond acceptor | Lipinski's rule of five |
|--------------------------------------------------------------------------------------------------|-------------------------------------------------|------------------|-------|---------|---------------------|------------------------|-------------------------|
| <i>Deoxycalyxin A</i>                                                                            | C <sub>35</sub> H <sub>34</sub> O <sub>7</sub>  | 566.640          | 7.329 | 127.450 | 5                   | 7                      | Suitable                |
| <i>3,5,7,3',4'-pentahydroxyflavonol-3-O-beta-D-galactopyranoside (3R)-3',8-Dihydroxyvestitol</i> | C <sub>24</sub> H <sub>26</sub> O <sub>10</sub> | 474.462          | 0.745 | 169.300 | 7                   | 9                      | Suitable                |
| <i>Sanggenon O</i>                                                                               | C <sub>16</sub> H <sub>16</sub> O <sub>6</sub>  | 304.294          | 2.236 | 99.380  | 4                   | 6                      | Suitable                |
| <i>Epigallocatechin gallate</i>                                                                  | C <sub>40</sub> H <sub>36</sub> O <sub>12</sub> | 708.716          | 6.562 | 214.440 | 8                   | 12                     | Suitable                |
| <i>Chamaejasmin</i>                                                                              | C <sub>22</sub> H <sub>18</sub> O <sub>11</sub> | 458.371          | 2.329 | 197.370 | 8                   | 10                     | Suitable                |
|                                                                                                  | C <sub>30</sub> H <sub>22</sub> O <sub>10</sub> | 542.48968        | 4.677 | 176.980 | 6                   | 10                     | Suitable                |
